# Supplementary material
Source: publisher figshare collection journal article supplement (https://wiley.figshare.com/articles/dataset/_/3568629)
Supplement: Supplementary file 1 [file 1]

Archive with 7 entries (7 files):
- suppl-1.htm
- BroadleafForestRawRecruitmentDataAllRecruitRefs.csv
- BroadleafForestRawRecruitmentDataRejectedRecruitRefs.pdf
- BroadleafForestRawRecruitmentDataRecruitment10yrBins.csv
- BroadleafForestRawRecruitmentDataRecruitment20yrBins.csv
- BroadleafForestRawRecruitmentDataRecruitment25yrBins.csv
- BroadleafForestRawRecruitmentDataRecruitment50yrBins.csv
