# Supplementary material
Source: publisher figshare collection journal article supplement (https://wiley.figshare.com/articles/dataset/_/3568629)
Supplement: Supplementary file 1 [file 1 › BroadleafForestRawRecruitmentDataRejectedRecruitRefs.pdf]

| Summary<br>Explanation     | REFERENCE                                                                                                                                                                                                                                                                                                                                                              | Note |
|----------------------------|------------------------------------------------------------------------------------------------------------------------------------------------------------------------------------------------------------------------------------------------------------------------------------------------------------------------------------------------------------------------|------|
| Duplicate data<br>/ Review | Abrams, M.D. 2003. Where has all the white oak gone. <i>BioScience</i> 53(10): 927-939.                                                                                                                                                                                                                                                                                |      |
| Duplicate data<br>/ Review | Abrams, M.D. 2007. Tales from the blackgum, a consummate subordinate tree. <i>BioScience</i> 57(4): 347-359.                                                                                                                                                                                                                                                           |      |
| Duplicate data<br>/ Review | Abrams, M.D., Orwig, D.A. 1996. A review of dendroecology and successional dynamics of old-growth and second-growth oak and pine forests in the eastern United States. Pages 343-352 in: J.S. Dean, D.M. Meko, and T.W. Swetnam, eds., <i>Tree Rings, Environment, and Humanity</i> . Radiocarbon, Department of Geosciences, , The University of Arizona, Tucson, AZ. |      |
| Duplicate data<br>/ Review | Blasing, T.J. 1980. How climatologists use tree ring data. In: P.P. Feret and T.L. Sharik, eds., <i>Dendrology in the Eastern Deciduous Biome</i> . School of Forestry and Wildlife Resources. School of Forestry and Wildlife Resources, Virginia Polytechnic Institute and State University Publication FWS-2-80: 108-109.                                           |      |
| Duplicate data<br>/ Review | Cho, D.S. 1989. Regeneration of oaks and the disturbance pattern in hardwood forests and oak savannas in Ohio. Ph.D. dissertation, Ohio State University, Columbus, OH, Columbus, OH. 204 pp.                                                                                                                                                                          |      |
| Duplicate data<br>/ Review | Cleaveland, M.K. 1980. Dating tree rings in the eastern United States. In: P.P. Feret and T.L. Sharik, eds., <i>Dendrology in the Eastern Deciduous Biome</i> . School of Forestry and Wildlife Resources. School of Forestry and Wildlife Resources, Virginia Polytechnic Institute and State University Publication FWS-2-80: 110-124.                               |      |
| Duplicate data<br>/ Review | Druckenbrod, D.L. 2003. Forest dynamics in the Virginia Piedmont. Ph.D. dissertation, University of Virginia, Charlottesville, VA. 209 pp.                                                                                                                                                                                                                             |      |
| Duplicate data<br>/ Review | Fekedulegn, D.B. 2001. Spatial and temporal analysis of radial growth in an Appalachian watershed. Ph.D. dissertation, West Virginia University, Morgantown. 270 pp.                                                                                                                                                                                                   |      |

|                                                  |                                                                                                                                                                                                                                                                                                                                                                                                             |
|--------------------------------------------------|-------------------------------------------------------------------------------------------------------------------------------------------------------------------------------------------------------------------------------------------------------------------------------------------------------------------------------------------------------------------------------------------------------------|
| Duplicate data<br>/ Review                       | Orwig, D.A. 1995. Community and dendroecological attributes of mixed-oak forests of northern Virginia ( <i>Quercus</i> , community dynamics). Ph.D. dissertation, Pennsylvania State University, State College, PA, State College, PA. 187 pp.                                                                                                                                                              |
| Duplicate data<br>/ Review                       | Rentch, J.S. 2001. Stand dynamics and disturbance history of five oak-dominated old-growth stands in the unglaciated Appalachian Plateau. Ph.D. dissertation, West Virginia University, Morgantown.                                                                                                                                                                                                         |
| Duplicate data<br>/ Review                       | Rentch, J.S., Fajvan, M.A., Hicks, Jr., R.R. 2003. Spatial and temporal disturbance characteristics of oak-dominated old-growth stands in the central hardwood forest region. <i>Forest Science</i> 49(5): 778-789.                                                                                                                                                                                         |
| Duplicate data<br>/ Review                       | Rentch, J.S., Hicks, Jr., R.R. 2003. Canopy disturbance intervals, early growth rates, and canopy accession trends of oak-dominated old-growth forests. In: J.W. Van Sambeek, J.O. Dawson, F. Ponder, Jr., E.F. Lowenstein, and J.S. Fralish, eds., <i>Proceedings, 13th Central Hardwood Conference, 2002 April 1-3, Urbana, Illinois</i> . USDA Forest Service General Technical Report NC- 234: 323-332. |
| Duplicate data<br>/ Review                       | Stahle, D.W. 1997. Tree rings and ancient forest relics. <i>Arnoldia</i> 56(4): 2-10.                                                                                                                                                                                                                                                                                                                       |
| Duplicate data<br>/ Review                       | Ziegler, S. S. (2002) Disturbance regimes of hemlock-dominated old-growth forests in northern New York, U.S.A. <i>Canadian Journal of Forest Research</i> . 32: 2106–2115.                                                                                                                                                                                                                                  |
| Duplicate data<br>/ Review                       | Ziegler, S.S. 2004. Composition, structure, and disturbance history of old-growth and second-growth forests in Adirondack Park, New York. <i>Physical Geography</i> 25(2): 152-169.                                                                                                                                                                                                                         |
| No age data or<br>not sufficiently<br>delineated | Agrawal, A., Stephenson, S.L. 1995. Recent successional changes in a former chestnut-dominated forest in southwestern Virginia. <i>Castanea</i> 60(2): 107-113.                                                                                                                                                                                                                                             |
| No age data or<br>not sufficiently<br>delineated | Batek, M.J., Rebertus, A.J., Schroeder, W.A., Haithcoat, T.L., Compas, E., Guyette, R.P. 1999. Reconstruction of early nineteenth-century vegetation and fire regimes in the Missouri Ozarks. <i>Journal of Biogeography</i> 26(2): 397-412.                                                                                                                                                                |

No age data or not sufficiently delineated      Black, B.A., Abrams, M.D. 2003. Use of boundary-line growth patterns as a basis for dendroecological release criteria. *Ecological Applications* 13(6): 1733-1749.

No age data or not sufficiently delineated      Black, B.A., Abrams, M.D. 2004. Development and application of boundary-line release criteria. *Dendrochronologia* 22(1): 31-42.

No age data or not sufficiently delineated      Bowers, L.J., Grashot, D.L. 1976. Results of the First Hermitage dendrochronological study. In: S.D. Smith, ed., *An Archaeological and Historical Assessment of the First Hermitage*. Division of Archaeology, Tennessee Department of Conservation, and The Ladies Hermitage Association, Nashville, Tennessee: 271-281.

No age data or not sufficiently delineated      Chokkalingam, U. 1998. Spatial and temporal patterns and dynamics in old-growth northern hardwood and mixed forests of northern Maine. Ph.D. dissertation, University of Maine, Orono, ME. 227 pp.

No age data or not sufficiently delineated      Chokkalingam, U., White, A. 2001. Structure and spatial patterns of trees in old-growth northern hardwood and mixed forests of northern Maine. *Plant Ecology* 156(2): 139-160.

No age data or not sufficiently delineated      Cleaveland, M.K., Stahle, D.W. 1996. Variability of hydrologic drought in the Ozark highlands, 1680-1980. In: J.S. Dean, D.M. Meko, and T.W. Swetnam, eds., *Tree Rings, Environment, and Humanity*. *Radiocarbon* 1996: 43-50.

No age data or not sufficiently delineated      Cook, E.R. 1980. A dendrochronological study of drought in the Hudson Valley, New York. In: P.P. Feret and T.L. Sharik, eds., *Dendrology in the Eastern Deciduous Biome*. School of Forestry and Wildlife Resources. School of Forestry and Wildlife Resources, Virginia Polytechnic Institute and State University Publication FWS-2-80: 133-141.

Unable to locate, but other evidence suggests should be rejected: Builders constructed the vernacular farmhouse with timbers made of tulip poplar, American elm, and red oak.  
[http://www.thehermitage.com/index.php?option=com\\_content&task=view&id=88&Itemid=110](http://www.thehermitage.com/index.php?option=com_content&task=view&id=88&Itemid=110)  
From Lewis et al.: Although the dating was unsuccessful, their study represented the first modern attempt at dating a historic-period structure using dendrochronology in the Southeastern U.S.

|                                            |                                                                                                                                                                                                                                                                           |
|--------------------------------------------|---------------------------------------------------------------------------------------------------------------------------------------------------------------------------------------------------------------------------------------------------------------------------|
| No age data or not sufficiently delineated | Cook, E.R., Briffa, K.R., Jones, P.D. 1994. Spatial regression methods in dendroclimatology: a review and comparison of two techniques. <i>International Journal of Climatology</i> 14: 379-402.                                                                          |
| No age data or not sufficiently delineated | Cook, E.R., D'Arrigo, R.D., Briffa, K.R. 1998. A reconstruction of the North Atlantic Oscillation using tree-ring chronologies from North America and Europe. <i>The Holocene</i> 8(1): 9-17.                                                                             |
| No age data or not sufficiently delineated | Cook, E.R., Stahle, D.W., Cleaveland, M.K. 1992. Dendroclimatic evidence from eastern North America. In: R.S. Bradley and P.D. Jones, eds., <i>Climate since A.D. 1500</i> . Routledge Press, London: 331-348.                                                            |
| No age data or not sufficiently delineated | Druckenbrod, D.L. 2005. Dendroecological reconstructions of forest disturbance history using time-series analysis with intervention detection. <i>Canadian Journal of Forest Research</i> 35(4): 868-876.                                                                 |
| No age data or not sufficiently delineated | Druckenbrod, D.L., Mann, M.E., Stahle, D.W., Cleaveland, M.K., Therrell, M.D., Shugart, H.H. 2003. Late-eighteenth-century precipitation reconstructions from James Madison's Montpelier plantation. <i>Bulletin of the American Meteorological Society</i> 84(1): 57-71. |
| No age data or not sufficiently delineated | Edwards, M.R. 1982. Dating buldings by tree ring analysis. In: <i>Three Centuries of Maryland Architecture</i> . Maryland Historical Trust Press, Annapolis, MD: 19-30.                                                                                                   |
| No age data or not sufficiently delineated | Fajvan, M.A., Seymour, R.S. 1993. Canopy stratification, age structure, and development of multicohort stands of eastern white pine, eastern hemlock, and red spruce. <i>Canadian Journal of Forest Research</i> 23(9): 1799-1809.                                        |
| No age data or not sufficiently delineated | Grissino-Mayer, H.D. 2009. An introduction to dendroarchaeology in the southeastern United States. <i>Tree-Ring Research</i> 65(1): 5-10.                                                                                                                                 |
| No age data or not sufficiently delineated | Guyette, R.P. 1994. A dendrochemical perspective on the effects of climate change in the Ozark Highlands. In: M. Beniston, ed., <i>Mountain Environments in Changing Climates</i> . Routledge Press, London: 259-269.                                                     |

|                                            |                                                                                                                                                                                                                                                                              |                                                        |
|--------------------------------------------|------------------------------------------------------------------------------------------------------------------------------------------------------------------------------------------------------------------------------------------------------------------------------|--------------------------------------------------------|
| No age data or not sufficiently delineated | Guyette, R.P., Rabeni, C.F. 1995. Climate response among growth increments of fish and trees. <i>Oecologia</i> 104: 272-279.                                                                                                                                                 |                                                        |
| No age data or not sufficiently delineated | Hawley, F.M. 1938. Dendrochronology in two Mississippi drainage tree-ring areas. <i>Tree-Ring Bulletin</i> 5(1): 3-7.                                                                                                                                                        | mentions some early establishment dates                |
| No age data or not sufficiently delineated | Hawley, F.M. 1938. Tree ring dating for southeastern mounds. In: W.S. Webb, ed., <i>An Archaeological Survey of the Norris Basin in Eastern Tennessee</i> . Smithsonian Institution Bureau of American Ethnology Bulletin 118: 359-362.                                      |                                                        |
| No age data or not sufficiently delineated | Hawley, F.M. 1941. Tree Ring Analysis and Dating in the Mississippi Drainage. <i>Publications in Anthropology Occasional Paper</i> 2. University of Chicago Press, Chicago, IL: 1-110.                                                                                       |                                                        |
| No age data or not sufficiently delineated | Heinselman, M.L. 1973. Fire in the virgin forests of the Boundary Waters Canoe Area, Minnesota. <i>Quaternary Research</i> 3: 329-382.                                                                                                                                       |                                                        |
| No age data or not sufficiently delineated | Hemenway, A.F. 1926. Late frost injury to some trees in central Kentucky. <i>American Journal of Botany</i> 13: 364-366.                                                                                                                                                     |                                                        |
| No age data or not sufficiently delineated | Hotchkiss, J. 1894. The growth of forest trees illustrated from marked corners 107 years old. <i>Botanical Gazette</i> 19(9): 379-380.                                                                                                                                       |                                                        |
| No age data or not sufficiently delineated | Hupp, C.R. 1983. Geo-botanical evidence of late Quaternary mass wasting in block field areas of Virginia. <i>Earth Surface Processes and Landforms</i> 8: 439-450.                                                                                                           |                                                        |
| No age data or not sufficiently delineated | Hupp, C.R., Sigafoos, R.S. 1982. Plant growth and block-field movement in Virginia. In: F.J. Swanson, R.J. Janda, T. Dunne, and D.N. Swanston, eds., <i>Sediment Budgets and Routing in Forested Drainage</i> . USDA Forest Service General Technical Report PNW 141: 78-85. |                                                        |
| No age data or not sufficiently delineated | Kincaid, J.A. and A.J. Parker. 2008. Structural characteristics and canopy dynamics of <i>Tsuga canadensis</i> in forests of the southern Appalachian Mountains, USA. <i>Plant Ecology</i> . Volume 199, Number                                                              | 20 year bins; does not distinguish years prior to 1695 |

|                                            |                                                                                                                                                                                                                             |
|--------------------------------------------|-----------------------------------------------------------------------------------------------------------------------------------------------------------------------------------------------------------------------------|
| No age data or not sufficiently delineated | Knight, T.A. 2003. Ice storm reconstruction using tree-ring data in northwest Georgia. M.S. thesis, Georgia State University, Atlanta, GA. 124 pp.                                                                          |
| No age data or not sufficiently delineated | Koerner, S.D., Grissino-Mayer, H.D., Sullivan, L.P., DeWeese, G.G. 2009. A dendroarchaeological approach to Mississippian Culture occupational history in eastern Tennessee, U.S.A. <i>Tree-Ring Research</i> 65(1): 81-90. |
| No age data or not sufficiently delineated | Landon, J. 1988. Interpreting modern and paleoenvironments by analysis of water stress in xylem: examples from Nebraska and Arkansas. <i>Transactions of the Nebraska Academy of Sciences</i> 16: 51-61.                    |
| No age data or not sufficiently delineated | Lassetter, R. 1938. A dendrochronological investigation in the Clinch River drainage, Tennessee. M.A. thesis, University of Tennessee, Knoxville, TN. 60 pp.                                                                |
| No age data or not sufficiently delineated | Lookingbill, S.M., Cleaveland, M.K., Guccione, M.J. 1987. Botanical evidence for Holocene movement of rock streams in Arkansas. <i>Proceedings, Arkansas Academy of Science</i> 41: 63-68.                                  |
| No age data or not sufficiently delineated | Lorimer, C.G., Dahir, S.E., Nordheim, E.V. 2001. Tree mortality rates and longevity in mature and old-growth hemlock-hardwood forests. <i>Journal of Ecology</i> 89(6): 960-971.                                            |
| No age data or not sufficiently delineated | Meko, D.M., Cook, E.R., Stahle, D.W., Stockton, C.W., Hughes, M.K. 1993. Spatial patterns of tree-growth anomalies in the United States and southeastern Canada. <i>Journal of Climate</i> 6(9): 1773-1786.                 |
| No age data or not sufficiently delineated | Merrrens, E.J., Peart, D.R. 1992. Effects of hurricane damage on individual growth and stand structure in a hardwood forest in New Hampshire, USA. <i>Journal of Ecology</i> 80: 787-795.                                   |
| No age data or not sufficiently delineated | Meyer, H.A. 1941. Growth fluctuations of virgin hemlock from northern Pennsylvania. <i>Tree-Ring Bulletin</i> 7(3): 20-23.                                                                                                  |

|                                            |                                                                                                                                                                                                                                                                                                                                                     |
|--------------------------------------------|-----------------------------------------------------------------------------------------------------------------------------------------------------------------------------------------------------------------------------------------------------------------------------------------------------------------------------------------------------|
| No age data or not sufficiently delineated | Nowacki, G.J., Abrams, M.D. 1997. Radial-growth averaging criteria for reconstructing disturbance histories from presettlement-origin oaks. <i>Ecological Monographs</i> 67(2): 225-249.                                                                                                                                                            |
| No age data or not sufficiently delineated | Phipps, R.L. 1980. Problems and potentials in deciduous forest tree-ring studies. In: P.P. Feret and T.L. Sharik, eds., <i>Dendrology in the Eastern Deciduous Biome</i> . School of Forestry and Wildlife Resources. School of Forestry and Wildlife Resources, Virginia Polytechnic Institute and State University Publication FWS-2-80: 104-107. |
| No age data or not sufficiently delineated | Phipps, R.L. 1983. Streamflow of the Occoquan River in Virginia as reconstructed from tree-ring series. <i>Water Resources Bulletin</i> 19(5): 735-743.                                                                                                                                                                                             |
| No age data or not sufficiently delineated | Phipps, R.L., Ireley, D.L., Baker, C.P. 1979. Tree rings as indicators of hydrologic change in the Great Dismal Swamp, Virginia and North Carolina. US Geological Survey Water Resources Investigations Report 78-136: 1-26.                                                                                                                        |
| No age data or not sufficiently delineated | Puckett, L.J. 1979. Reconstruction of drought in Virginia: a dendroclimatic investigation. M.S. thesis, George Mason University, Fairfax, VA, Fairfax, VA.                                                                                                                                                                                          |
| No age data or not sufficiently delineated | Puckett, L.J. 1981. Dendroclimatic estimates of a drought index for northern Virginia. US Geological Survey Professional Paper 2080: 1-39.                                                                                                                                                                                                          |
| No age data or not sufficiently delineated | Quiring, S.M. 2004. Growing-season moisture variability in the eastern USA during the last 800 years. <i>Climate Research</i> 27(1): 9-17.                                                                                                                                                                                                          |
| No age data or not sufficiently delineated | Rubino, D.L., McCarthy, B.C. 2004. Comparative analysis of dendroecological methods used to assess disturbance events. <i>Dendrochronologia</i> 21(3): 97-115.                                                                                                                                                                                      |
| No age data or not sufficiently delineated | Runkle, J.R. 1982. Patterns of disturbance in some old-growth mesic forests of eastern North America. <i>Ecology</i> 63(5): 1533-1546.                                                                                                                                                                                                              |

|                                            |                                                                                                                                                                                                                                                    |
|--------------------------------------------|----------------------------------------------------------------------------------------------------------------------------------------------------------------------------------------------------------------------------------------------------|
| No age data or not sufficiently delineated | Schulman, E. 1944. Notes on dendrochronologies at the Arnold Arboretum. <i>Tree-Ring Bulletin</i> 10(4): 30-32.                                                                                                                                    |
| No age data or not sufficiently delineated | Schwegler, D.E. 1983. Dendroclimatology in northern West Virginia. M.S. thesis, West Virginia University, Morgantown, Morgantown, WV. 41 pp.                                                                                                       |
| No age data or not sufficiently delineated | Scott, M.L., Murphy, P.G. 1986. Origin and composition of an old-growth cedar-hardwood stand: the role of dune activity. <i>Michigan Botanist</i> 25: 57-65.                                                                                       |
| No age data or not sufficiently delineated | Sheppard, P.R., Cook, E.R. 1988. Scientific value of trees in old-growth natural areas. <i>Natural Areas Journal</i> 8(1): 7-12.                                                                                                                   |
| No age data or not sufficiently delineated | Smith, P.C. 1883. The age of trees. <i>Popular Science Monthly</i> 23(4): 552-553.                                                                                                                                                                 |
| No age data or not sufficiently delineated | Stahle, D.W. 1996. Tree rings and ancient forest history. In: M.B. Davis, ed., <i>Eastern Old-Growth Forests: Prospects for Rediscovery and Recovery</i> . Island Press, Washington, D.C.: 321-343.                                                |
| No age data or not sufficiently delineated | Stahle, D.W., Hehr, J.G. 1984. Dendroclimatic relationships of post oak across a precipitation gradient in the southcentral United States. <i>Annals of the Association of American Geographers</i> 74(4): 561-573.                                |
| No age data or not sufficiently delineated | Steele, J.K. 2007. Influence of elevation on tree species distribution and growth in the southern Appalachian Mountains. M.S. thesis, Virginia Polytechnic Institute and State University, Blacksburg, Virginia.                                   |
| No age data or not sufficiently delineated | Stephano, P.J. 1991. Revelation in the rings: An inside look at the tales trees tell. <i>Wood Magazine</i> 8(4): 60-63.                                                                                                                            |
| Too young                                  | Abrams, M.D., Black, B.A. 2000. Dendroecological analysis of a mature loblolly pine-mixed hardwood forest at the George Washington Birthplace National Monument, eastern Virginia. <i>Journal of the Torrey Botanical Society</i> 127(2): 139-148. |

- Too young Abrams, M.D., Ruffner, C.M., DeMeo, T.E. 1998. Dendroecology and species co-existence in an old-growth *Quercus-Acer-Tilia* talus slope forest in the central Appalachians, USA. *Forest Ecology and Management* 106(1): 9-18.
- Too young Agrawal, A., Stephenson, S.L. 1995. Recent successional changes in a former chestnut-dominated forest in southwestern Virginia. *Castanea* 60(2): 107-113.
- Too young Ambers, R.K.R., Druckenbrod, D.L., Ambers, C.P. 2006. Geomorphic response to historical agriculture at Monument Hill in the Blue Ridge foothills of central Virginia. *Catena* 65(1): 49-60.
- Too young Bonkougou, G.J.E., Raynal, D.J., Geis, J.W. 1983. Tree population dynamics in relation to climate and forest history in the Oswegatchie Plains, New York. *Vegetatio* 54: 37-59.
- Too young Clark, S.L., Brosi, S.L., Schlarbaum, S.E., Grissino-Mayer, H.D. 2008. Dendrochronology of two butternut (*Juglans cinerea*) populations in the southeastern United States. *Forest Ecology and Management* , doi:10.1016/j.foreco.2007.11.040.
- Too young Copenheaver, C.A., Black, B.A., Stine, M.B., McManamay, R.H., Bartens, J. 2009. Identifying dendroecological growth releases in American beech, jack pine, and white oak: Within-tree sampling strategy. *Forest Ecology and Management* 257(11): 2235-2240.
- Too young Copenheaver, C.A., Fuhrman, N.E., Gellerstedt, L.S., Gellerstedt, P.A. 2004. Tree encroachment in forest openings: a case study from Buffalo Mountain, Virginia. *Castanea* 69(4): 297-308.
- Too young Copenheaver, C.A., Grinter, L.E., Lorber, J.H., Neathour, M.A., Spinney, M.P. 2002. A dendroecological and dendroclimatic analysis of *Pinus virginia* and *Pinus rigida* at two slope positions in the Virginia Piedmont. *Castanea* 67: 302-315.
- Too young Copenheaver, C.A., Kyle, K.H., Stevens, G.N., Kamp, M.H. 2005. Comparing *Juniperus virginiana* tree-ring chronologies from forest edge vs. forest interior positions in the Cedars Natural Area Preserve in Virginia, USA. *Dendrochronologia* 23(1): 39-45.
- Too young Dougherty, P. 2001. A dendroecological study of eastern hemlock decline in the Shenandoah National Park (Virginia). Ph.D.

dissertation, George Mason University, Fairfax, VA. 158 pp.

- Too young Fekedulegn, D., Hicks, Jr., R.R., Colbert, J.J. 2003. Influence of topographic aspect, precipitation and drought on radial growth of four major tree species in an Appalachian watershed. *Forest Ecology and Management* 177(1-3): 409-425.
- Too young Foster, D.R., Clayden, S., Orwig D.A., Hall, B. 2002. Oak, chestnut and fire: climatic and cultural controls of long-term forest dynamics in New England, USA. *Journal of Biogeography* 29(10/11): 1359-1379.
- Too young Harmon, M. 1982. Fire history of the westernmost portion of Great Smoky Mountains National Park. *Bulletin of the Torrey Botanical Club* 109(1): 74-79.
- Too young Harrod, J.C., White, R.D. 1999. Age structure and radial growth in xeric pine-oak forests in western Great Smoky Mountains National Park. *Journal of the Torrey Botanical Society* 126(2): 139-146.
- Too young Hart, J.L., van de Gevel, S.L., Grissino-Mayer, H.D. 2008. Land use and forest dynamics in a natural area of the Southern Ridge and Valley. *Natural Areas Journal* 28(3): 275-289.
- Too young Henderson, N.R., Long, J.N. 1984. A comparison of stand structure and fire history in two black oak woodlands in northwestern Indiana. *Botanical Gazette* 145(2): 222-228.
- Too young Jenkins, S.E., Guyette, R., Rebertus, A.J. 1997. Vegetation-site relationships and fire history of a savanna-glade-woodland mosaic in the Ozarks. In: S.G. Pallardy, R.A. Cecich, H.E. Garrett, and P.S. Johnson, eds., *Proceedings, 11th Central Hardwood Forest Conference, 1997 March 23-26, Columbia, Missouri*. USDA Forest Service General Technical Report NC- 188: 184-201.
- Too young Karnitz, H., Asbjornsen, H. 2006. Composition and age structure of a degraded tallgrass oak savanna in central Iowa. *Natural Areas Journal* 26(2): 179-186.
- Too young Knapp, L.B., Canham, C.D. 2000. Invasion of an old-growth forest in New York by *Ailanthus altissima*: sapling growth and recruitment in canopy gaps. *Journal of the Torrey Botanical*

Society 127(4): 307-315.

- Too young Lafon, C.W. 2000. Patterns and consequences of ice storms in forested Appalachian landscapes. Ph.D. dissertation, University of Tennessee, Knoxville, TN. 230 pp.
- Too young Lafon, C.W. 2004. Stand dynamics of a yellow-poplar (*Liriodendron tulipifera* L.) forest in the Appalachian Mountains, Virginia, USA. *Dendrochronologia* 22(1): 43-52.
- Too young Lafon, C.W., Speer, J.H. 2002. Using dendrochronology to identify major ice storm events in oak forests of southwestern Virginia. *Climate Research* 20(1): 41-54.
- Too young McCarthy, B.C., Bailey, D.R. 1996. Composition, structure, and disturbance history of Crabtree Woods: An old-growth forest of western Maryland. *Bulletin of the Torrey Botanical Club* 123(4): 350-365.
- Too young Orwig, D.A., Abrams, M.D. 1995. Dendroecological and ecophysiological analysis of gap environments in mixed-oak understories of northern Virginia. *Functional Ecology* 9(6): 799-806.
- Too young Orwig, D.A., Abrams, M.D. 1997. Variation in radial growth responses to drought among species, site, and canopy strata. *Trees* 11: 474-484.
- Too young Pan, C., Tajchman, S.J., Kochenderfer, J.N. 1997. Dendroclimatological analysis of major forest species of the central Appalachians. *Forest Ecology and Management* 98(1): 77-88.
- Too young Pedersen, B.S. 1998. The role of stress in the mortality of Midwestern oaks as indicated by growth prior to death. *Ecology* 79(1): 79-93.
- Too young Pedersen, B.S., McCune, B. 2001. A non-invasive method for reconstructing the relative mortality rates of trees in mixed-age, mixed-species forests. *Forest Ecology and Management* 155(1-3): 303-314.

- Too young Rentch, J.S., Anderson, J.T. 2008. Stand development of trembling aspen in Canaan Valley, West Virginia. In: D.F., Jacobs and C.H. Michler, eds., Proceedings of the 16th Central Hardwood Forest Conference. USDA Forest Service, General Technical Report NRS-P-24: 413-422.
- Too young Rentch, J.S., Desta, F., Miller, G.W. 2002. Climate, canopy disturbance, and radial growth averaging in a second-growth mixed-oak forest in West Virginia, U.S.A. Canadian Journal of Forest Research 32(6): 915-927.
- Too young Royall, D. 2000. Dendrohydrological evidence of flooding along a small Appalachian stream. Southeastern Geographer 41(2): 151-167.
- Too young Schuler, T.M., McClain, W.R. 2003. Fire history of a ridge and valley oak forest. USDA Forest Service Research Paper NE- 724: 1-9.
- Too young Shelton, M.G., Cain, M.D. 1999. Structure and short-term dynamics of the tree component of a mature pine-oak forest in southeastern Arkansas. Journal of the Torrey Botanical Society 126(1): 32-48.
- Too young Shelton, M.G., Murphy, P.A. 1991. Age and size structure of a shortleaf pine-oak stand in the Ouachita Mountains - Implications for uneven-aged management. In: S.S. Coleman and D.G. Neary, eds., Proceedings of the Sixth Biennial Southern Silvicultural Research Conference, Memphis, Tennessee, October 30 - November 1, 1990. USDA Forest Service General Technical Report SE- 70: 616-629.
- Too young Shuman, B., A.K. Henderson, C. Plank, I. Stefanova, and S.S. Ziegler. 2009. Woodland-to-forest transition during prolonged drought in Minnesota after ca. AD 1300. Ecology 90: 2792-2807.
- Too young Smolnik, M.J. 2004. Using dendrochronology to identify species-specific ice storm damage in Delaware. M.A. thesis, West Virginia University, Morgantown. 39 pp.
- Too young Stephenson, S.L., Adams, H.S. 1989. The high-elevation red oak (*Quercus rubra*) community type in western Virginia. Castanea

54(4): 217-229.

- |                            |                                                                                                                                                                                                                                                                            |
|----------------------------|----------------------------------------------------------------------------------------------------------------------------------------------------------------------------------------------------------------------------------------------------------------------------|
| Too young                  | Tryon, E.H., Myers, C.A. 1952. Periodic precipitation affects growth of yellow poplar on a West Virginia hillside. <i>Castanea</i> 17(2): 97-102.                                                                                                                          |
| Too young                  | Tryon, E.H., True, R.P. 1958. Recent reductions in annual increments in dying scarlet oaks related to rainfall deficiencies. <i>Forest Science</i> 4(3): 219-230.                                                                                                          |
| Too young                  | Wolf, J.J. 2006. Effects of disturbance frequency on canopy age structure and species composition in a managed midwestern oak savanna. <i>Physical Geography</i> 27(6): 519-533.                                                                                           |
| Too young                  | Yanosky, T.M. 1983. Evidence of floods on the Potomac River from anatomical abnormalities in the wood of flood-plain trees. US Geological Survey Professional Paper 1296: 1-42.                                                                                            |
| Wrong Species or Ecosystem | Abrams, M.D., Scott, M.L. 1989. Disturbance-mediated accelerated succession in two Michigan forest types. <i>Forest Science</i> 35(1): 42-49.                                                                                                                              |
| Wrong Species or Ecosystem | Adams, H.S., McLaughlin, S.B., Blasing, T.J., Duvick, D.N. 1990. A survey of radial growth trends in spruce in the Great Smokey Mountains National Park as influenced by topography, age, and stand development. Oak Ridge National Laboratory Publication TM-11424: 1-62. |
| Wrong Species or Ecosystem | Adams, H.S., Stephenson, S.L. 1989. Old-growth red spruce communities in the mid-Appalachians. <i>Vegetatio</i> 85: 45-56.                                                                                                                                                 |
| Wrong Species or Ecosystem | Adams, H.S., Stephenson, S.L., Blasing, T.J., Duvick, D.N. 1985. Growth-trend declines of spruce and fir in mid-Appalachian subalpine forests. <i>Environmental and Experimental Botany</i> 25(4): 315-326.                                                                |
| Wrong Species or Ecosystem | Arabas, K.B. 1997. Fire and vegetation dynamics in the eastern serpentine barrens. Ph.D. dissertation, Pennsylvania State University, State College, PA, State College, PA. 224 pp.                                                                                        |
| Wrong Species or Ecosystem | Armbrister, M.R. 2002. Changes in fire regimes and the successional status of Table Mountain pine ( <i>Pinus pungens</i> Lamb.) in the southern Appalachians, USA. M.S. thesis, University of                                                                              |

Tennessee, Knoxville, Knoxville, TN. 151 pp.

- |                               |                                                                                                                                                                                                                                                                                                                         |
|-------------------------------|-------------------------------------------------------------------------------------------------------------------------------------------------------------------------------------------------------------------------------------------------------------------------------------------------------------------------|
| Wrong Species<br>or Ecosystem | Ayres, M.P., Lombardero, M.J., Ayres, B.D., Santoro, A.E. 1999. The biology and management of bark beetles in old growth forests of the Itasca State Park. Great Lakes Institute of Pine Ecosystem Research, Colfax, Wisconsin.                                                                                         |
| Wrong Species<br>or Ecosystem | Barden, L.S. 2000. Population maintenance of <i>Pinus pungens</i> Lam. (Table Mountain pine) after a century without fire. <i>Natural Areas Journal</i> 20: 227-233.                                                                                                                                                    |
| Wrong Species<br>or Ecosystem | Barton, A.M., Grenier, D.J. 2008. Dynamics of jack pine at the southern range boundary in downeast Maine. <i>Canadian Journal of Forest Research</i> 38(4), doi:10.1139/X07-176 : 733-743.                                                                                                                              |
| Wrong Species<br>or Ecosystem | Blanton, D.B. 2000. Drought as a factor in the Jamestown Colony, 1607-1612. <i>Historical Archaeology</i> 34(4): 74-81.                                                                                                                                                                                                 |
| Wrong Species<br>or Ecosystem | Brose, P.H., Tainter, F.H., Waldrop, T.A. 2002. Regeneration history of three Table Mountain pine/pitch pine stands in northern Georgia. In: K.W. Outcalt, ed., <i>Proceedings of the Eleventh Biennial Southern Silvicultural Research Conference</i> . USDA Forest Service General Technical Report SRS- 48: 296-301. |
| Wrong Species<br>or Ecosystem | Brose, P.H., Waldrop, T.A. 2006. Fire and the origin of Table Mountain pine-pitch pine communities in the southern Appalachian Mountains, USA. <i>Canadian Journal of Forest Research</i> 36(3): 710-718.                                                                                                               |
| Wrong Species<br>or Ecosystem | Brugam, R.B., Crenshaw, M.C., Giese, L.A.B. 2007. Historical development of the cypress/tupelo swamp at Horseshoe Lake, Alexander County, Illinois, USA. <i>Wetlands</i> 27(2): 305-318.                                                                                                                                |
| Wrong Species<br>or Ecosystem | Cassidy, P.D. 2004. Dynamics and development of shortleaf pine in east Tennessee. Ph.D. dissertation, University of Tennessee, Knoxville, TN. 99 pp.                                                                                                                                                                    |
| Wrong Species<br>or Ecosystem | Conkey, L.E. 1988. Decline in old-growth red spruce in western Maine: an analysis of wood density and climate. <i>Canadian Journal of Forest Research</i> 18: 1063-1068.                                                                                                                                                |

|                               |                                                                                                                                                                                                                                                                                  |
|-------------------------------|----------------------------------------------------------------------------------------------------------------------------------------------------------------------------------------------------------------------------------------------------------------------------------|
| Wrong Species<br>or Ecosystem | Conkey, L.E., Keifer, M., Lloyd, A.H. 1995. Disjunct jack pine ( <i>Pinus banksiana</i> Lamb.) structure and dynamics, Acadia National Park, Maine. <i>Ecoscience</i> 2(2): 168-176.                                                                                             |
| Wrong Species<br>or Ecosystem | DeBrunner, L.E. 1967. The evaluation of certain climate related factors to diameter growth of loblolly pine ( <i>Pinus taeda</i> L.) and Virginia pine ( <i>Pinus virginiana</i> Mill.) in the Duke Forest. Ph.D. dissertation, Duke University, Durham, NC, Durham, NC. 133 pp. |
| Wrong Species<br>or Ecosystem | DeWeese, G.G. 2007. Past fire regimes of Table Mountain pine ( <i>Pinus pungens</i> Lamb.) stands in the central Appalachian Mountains, Virginia, U.S.A. Ph.D. dissertation, University of Tennessee, Knoxville, TN. 308 pp.                                                     |
| Wrong Species<br>or Ecosystem | Duever, M.J., Riopelle, L.A. 1984. Tree-ring analysis in the Okefenokee Swamp. In: A.D. Cohen, D.J. Casagrande, M.J. Andrejko and G.R. Best, eds., <i>The Okefenokee Swamp: its natural history, geology and geochemistry</i> . Wetland Surveys, Los Alamos, NM: 180-188.        |
| Wrong Species<br>or Ecosystem | Duever, M.J., Riopelle, L.A. 1988. Tree-ring analysis in the Okefenokee Swamp. <i>Okefenokee Ecosystem Investigations Publication</i> (University of Georgia, Athens) 30: 180-188.                                                                                               |
| Wrong Species<br>or Ecosystem | Earley, L. S. 1990. Clues from the Methuselahs. Ancient cypress in a North Carolina swamp give scientists a record of climate patterns far into the past - and a look into the future. In: <i>The last wetlands</i> . Audubon/Speaking for nature July 1990: 68-74.              |
| Wrong Species<br>or Ecosystem | Fitzgerald, B.T., Raynal, D.J. 1991. Population dynamics and growth of balsam fir on Whiteface Mountain, New York. <i>Bulletin of the Torrey Botanical Club</i> 118(3): 255-264.                                                                                                 |
| Wrong Species<br>or Ecosystem | Forrester, J.A., Leopold, D.J., Art, H.W. 2007. Disturbance history and mortality patterns in a rare Atlantic barrier island maritime holly forest. <i>Natural Areas Journal</i> 27(2): 169-182.                                                                                 |
| Wrong Species<br>or Ecosystem | Fraver, S. 2004. Spatial and temporal patterns of natural disturbances in old-growth forests of northern Maine, USA. Ph.D. dissertation, University of Maine, Orono. 185 pp.                                                                                                     |
| Wrong Species<br>or Ecosystem | Fraver, S., White, A.S. 2005. Disturbance dynamics of old-growth <i>Picea rubens</i> forests of northern Maine. <i>Journal of Vegetation</i>                                                                                                                                     |

Science 16(5): 597-610.

- |                               |                                                                                                                                                                                                                                                                                                                                                          |
|-------------------------------|----------------------------------------------------------------------------------------------------------------------------------------------------------------------------------------------------------------------------------------------------------------------------------------------------------------------------------------------------------|
| Wrong Species<br>or Ecosystem | Gilliam, F.S., Platt, W.J. 1999. Effects of long-term fire exclusion on tree species composition and stand structure in an old-growth <i>Pinus palustris</i> (longleaf pine) forest. <i>Plant Ecology</i> 140(1): 15-26.                                                                                                                                 |
| Wrong Species<br>or Ecosystem | Goelz, J.C.G., Burk, T.E., Zedaker, S.M. 1999. Long-term growth trends of red spruce and fraser fir at Mt Rogers, Virginia and Mt Mitchell, North Carolina. <i>Forest Ecology and Management</i> 115(1): 49-59.                                                                                                                                          |
| Wrong Species<br>or Ecosystem | Greenberg, C.H., Simons, R.W. 1999. Age, composition, and stand structure of old-growth oak sites in the Florida high pine landscape: implications for ecosystem management and restoration. <i>Natural Areas Journal</i> 19(1): 30-40.                                                                                                                  |
| Wrong Species<br>or Ecosystem | Guyette, R., McGinnes, Jr., E.A. 1982. Fire history of an Ozark glade in Missouri. <i>Transactions, Missouri Academy of Science</i> 16: 85-93.                                                                                                                                                                                                           |
| Wrong Species<br>or Ecosystem | Guyette, R., McGinnes, Jr., E.A., LeDuc, S. 1982. Climatic history in the Ozark region as reconstructed from the tree rings of Eastern redcedar and white oak. In: <i>Proceedings of the Cedar Glade Symposium</i> , April 23-24, 1982. The Missouri Academy of Science, Occasional Paper 7: 80-111.                                                     |
| Wrong Species<br>or Ecosystem | Guyette, R., McGinnes, Jr., E.A., Probasco, G.E., Evans, K.E. 1980. A climate history of Boone County, Missouri, from tree-ring analysis of Eastern redcedar. <i>Wood and Fiber</i> 12(1): 17-28.                                                                                                                                                        |
| Wrong Species<br>or Ecosystem | Guyette, R.P., Cutter, B.E. 1991. Tree-ring analysis of fire history of a post oak savanna in the Missouri Ozarks. <i>Natural Areas Journal</i> 11(2): 93-99.                                                                                                                                                                                            |
| Wrong Species<br>or Ecosystem | Guyette, R.P., Cutter, B.E. 1997. Fire history, population, and calcium cycling in the Current River watershed. In: S.G. Pallardy, R.A. Cecich, H.E. Garrett, and P.S. Johnson, eds., <i>Proceedings, 11th Central Hardwood Forest Conference</i> , 1997 March 23-26, Columbia, Missouri. USDA Forest Service General Technical Report NC- 188: 354-372. |

|                               |                                                                                                                                                                                                                                                                                                                                                |                                                   |
|-------------------------------|------------------------------------------------------------------------------------------------------------------------------------------------------------------------------------------------------------------------------------------------------------------------------------------------------------------------------------------------|---------------------------------------------------|
| Wrong Species<br>or Ecosystem | Harcombe, P.A., Glitzenstein, J.S., Knox, R.G., Orzell, S.L., Bridges, E.L. 1993. Vegetation of the longleaf pine region of the west Gulf Coastal Plain. In: S.M. Hermann, K. Ross, and K. Gainey, eds., The Longleaf Pine Ecosystem: Ecology, Restoration and Management. Proceedings of the Tall Timbers Fire Ecology Conference 18: 83-104. |                                                   |
| Wrong Species<br>or Ecosystem | Hawley, F.M. 1937. Relationship of southern cedar growth to precipitation and run off. Ecology 18(3): 398-405.                                                                                                                                                                                                                                 |                                                   |
| Wrong Species<br>or Ecosystem | Heitzman, E., Shelton, M.G., Grell, A. 2004. Species composition, size structure, and disturbance history of an old growth bottomland hardwood-loblolly pine ( <i>Pinus taeda</i> L.) forest in Arkansas, USA . Natural Areas Journal 24(3): 177-187.                                                                                          |                                                   |
| Wrong Species<br>or Ecosystem | Hett, J.M., Loucks, O.L. 1976. Age structure models of balsam fir and eastern hemlock. Journal of Ecology 64: 1029-1044.                                                                                                                                                                                                                       |                                                   |
| Wrong Species<br>or Ecosystem | Hornbeck, J.W., Kochenderfer, J.N. 1998. Growth trends and management implications for West Virginia's red spruce forests. Northern Journal of Applied Forestry 15(4): 197-202.                                                                                                                                                                |                                                   |
| Wrong Species<br>or Ecosystem | Hoss, J.A., Lafon, C.W., Grissino-Mayer, H.D., Aldrich, S.R., DeWeese, G.G. 2008. Fire history of a temperate forest with an endemic fire-dependent herb. Physical Geography 29(5): 424-441.                                                                                                                                                   | Mostly young; pine. Est dates of 1775, 1800, 1835 |
| Wrong Species<br>or Ecosystem | Houle, G., Delwaide, A. 1991. Population structure and growth-stress relationship of <i>Pinus taeda</i> in rock outcrop habitats. Journal of Vegetation Science 2: 47-58.                                                                                                                                                                      |                                                   |
| Wrong Species<br>or Ecosystem | Johnson, S.R., Young, D.R. 1992. Variation in tree ring width in relation to storm activity for mid-Atlantic Barrier Island populations of <i>Pinus taeda</i> . Journal of Coastal Research 8(1): 99-104.                                                                                                                                      |                                                   |
| Wrong Species<br>or Ecosystem | Lafon, C.W., Kutac, M.J. 2003. Effects of ice storms, southern pine beetle infestation, and fire on Table Mountain pine forests of southwestern Virginia. Physical Geography 24(6): 502-519.                                                                                                                                                   |                                                   |
| Wrong Species<br>or Ecosystem | Lewis, D.B., Nelson, W.L., Grissino-Mayer, H.D., Cook, E.R., Jones, R.D. 2009. Dendrochronological dating of eastern red cedar ( <i>Juniperus virginiana</i> L.) logs from Alfred's Cabin, The Hermitage, Home of President Andrew Jackson. Tree-Ring Research 65(1): 47-                                                                      |                                                   |

|                               |                                                                                                                                                                                                                                                                                                                                                                                                                         |  |
|-------------------------------|-------------------------------------------------------------------------------------------------------------------------------------------------------------------------------------------------------------------------------------------------------------------------------------------------------------------------------------------------------------------------------------------------------------------------|--|
| Wrong Species<br>or Ecosystem | Mann, D.H., Engstrom, F.B., Bubier, J.L. 1994. Fire history and tree recruitment in an uncut New England forest. <i>Quaternary Research</i> 42(4): 206-215.                                                                                                                                                                                                                                                             |  |
| Wrong Species<br>or Ecosystem | Masters, R.E., Skeen, J.E., Whitehead, J. 1993. Preliminary fire history of McCurtain County Wilderness Area and implications for red-cockaded woodpecker management. In: D.L. Kulhavy, R.G. Hooper, and R. Costa, eds., <i>Red-cockaded Woodpecker: Recovery, Ecology and Management</i> . Center for Applied Studies in Forestry College of Forestry, Stephen F. Austin State University, Nacodoches, Texas: 290-302. |  |
| Wrong Species<br>or Ecosystem | McCollom, J., Neuman, L., Duever, M. 1985. Tree ring analysis at Lake Hatchineha. Report to the Department of Natural Resources, State of Florida. Florida, 29 pp. + appendix.                                                                                                                                                                                                                                          |  |
| Wrong Species<br>or Ecosystem | McGinnes, Jr., E.A., Guyette, R.P., Kreft, K.R., Burroughs, J.M. 1983. Climate, fire, and stream runoff histories based on analysis of old redcedar of the Ozarks. <i>Journal of Applied Polymer Science, Applied Polymer Symposium</i> 37: 1097-1115.                                                                                                                                                                  |  |
| Wrong Species<br>or Ecosystem | Motzkin, G., Orwig, D.A., Foster, D.R. 2002. Vegetation and disturbance history of a rare dwarf pitch pine community in western New England, USA. <i>Journal of Biogeography</i> 29(10-11): 1455-1467.                                                                                                                                                                                                                  |  |
| Wrong Species<br>or Ecosystem | Parker, A.J., Parker, K.C., Faust, T.D., Fuller, M.M. 2001. The effects of climatic variability on radial growth of two varieties of sand pine ( <i>Pinus clausa</i> ) in Florida, USA. <i>Annals of Forest Science</i> 58(4): 333-350.                                                                                                                                                                                 |  |
| Wrong Species<br>or Ecosystem | Parker, A.J., Parker, K.C., McCay, D.H. 2001. Disturbance-mediated variation in stand structure between varieties of <i>Pinus clausa</i> (sand pine). <i>Annals of the Association of American Geographers</i> 91(1): 28-47.                                                                                                                                                                                            |  |
| Wrong Species<br>or Ecosystem | Pederson, N.A., Jones, R.H., Sharitz, R.R. 1997. Age structure and possible origins of old <i>Pinus taeda</i> stands in a floodplain forest.                                                                                                                                                                                                                                                                            |  |

oak-shortleaf pine

Journal of the Torrey Botanical Society 124(2): 111-123.

|                               |                                                                                                                                                                                                                                                           |                                  |
|-------------------------------|-----------------------------------------------------------------------------------------------------------------------------------------------------------------------------------------------------------------------------------------------------------|----------------------------------|
| Wrong Species<br>or Ecosystem | Phipps, R.L., Ireley, D.L., Baker, C.P. 1979. Tree rings as indicators of hydrologic change in the Great Dismal Swamp, Virginia and North Carolina. US Geological Survey Water Resources                                                                  | ILL did not come through in time |
| Wrong Species<br>or Ecosystem | Reams, G.A., Nicholas, N.S., Zedaker, S.M. 1993. Two hundred year variation of southern red spruce radial growth as estimated by spectral analysis. Canadian Journal of Forest Research 23(2): 291-301.                                                   |                                  |
| Wrong Species<br>or Ecosystem | Reams, G.A., Van Deusen, P.C. 1993. Synchronic large-scale disturbances and red spruce growth decline. Canadian Journal of Forest Research 23(7): 1361-1374.                                                                                              |                                  |
| Wrong Species<br>or Ecosystem | Rentch, J.S., Schuler, T.M., Ford, W.M., Nowacki, G.J. 2007. Red spruce stand dynamics, simulations, and restoration opportunities in the central Appalachians. Restoration Ecology 15(3): 440-452.                                                       |                                  |
| Wrong Species<br>or Ecosystem | Schwartz, M.W., Hermann, S.M. 1999. Is slow growth of the endangered <i>Torreya taxifolia</i> (Arn.) normal?. Journal of the Torrey Botanical Society 126(4): 307-312.                                                                                    |                                  |
| Wrong Species<br>or Ecosystem | Spond, M.D. 2007. Ancient cypress-tupelo forest at the Dagmar Wildlife Management Area, Arkansas. M.S. thesis, University of Arkansas, Fayetteville. 85 pp.                                                                                               |                                  |
| Wrong Species<br>or Ecosystem | Stahle, D.W., Cleaveland, M.K., Blanton, D.B., Therrell, M.D., Gay, D.A. 1998. The Lost Colony and Jamestown droughts. Science 280: 564-567.                                                                                                              |                                  |
| Wrong Species<br>or Ecosystem | Stambaugh, M.C. 2002. Forest canopy gap dynamics in shortleaf pine forests of the Ozark highlands. M.S. thesis, University of Missouri, Columbia, MO. 186 pp.                                                                                             |                                  |
| Wrong Species<br>or Ecosystem | Stambaugh, M.C., Muzika, R., Guyette, R.P. 2002. Disturbance characteristics and overstory composition of an old-growth shortleaf pine ( <i>Pinus echinata</i> Mill.) forest in the Ozark Highlands, Missouri, USA. Natural Areas Journal 22(2): 108-119. |                                  |
| Wrong Species<br>or Ecosystem | Stephenson, S.L., Adams, H.S. 1986. An ecological study of balsam fir communities in West Virginia. Bulletin of the Torrey Botanical Club 113(4): 372-381.                                                                                                |                                  |

|                               |                                                                                                                                                                                                                                                                                                                                                                                                                |
|-------------------------------|----------------------------------------------------------------------------------------------------------------------------------------------------------------------------------------------------------------------------------------------------------------------------------------------------------------------------------------------------------------------------------------------------------------|
| Wrong Species<br>or Ecosystem | Tomlinson, P.B., Craighead, Sr., F.C. 1972. Growth-ring studies on the native trees of sub-tropical Florida. In: A.K.M. Ghouse and M. Yunus, eds., Research Trends in Plant Anatomy. Tata McGraw-Hill, Bombay: 39-51.                                                                                                                                                                                          |
| Wrong Species<br>or Ecosystem | van de Gevel, S.L., Hart, J.L., Grissino-Mayer, H.D., Robinson, K.W. 2009. Tree-ring dating of old-growth longleaf pine ( <i>Pinus palustris</i> Mill.) logs from an exposed timber crib dam, Hope Mills, North Carolina, U.S.A. <i>Tree-Ring Research</i> 65(1): 69-80.                                                                                                                                       |
| Wrong Species<br>or Ecosystem | Waldrop, T.A., Brose, P.H., Welch, N.T., Mohr, H.H., Gray, E.A., Tainter, F.H., Ellis, L.E. 2003. Are crown fires necessary for Table Mountain pine?. In: K.E.M. Galley, R.C. Klinger, and N.G. Sugihara, eds., Fire Conference 2000: The First National Congress on Fire Ecology, Prevention, and Management. Tall Timbers Research Station, Tallahassee, Florida. Miscellaneous Publication No. 13: 157-163. |
| Wrong Species<br>or Ecosystem | Waldrop, T.A., Welch, N.T., Brose, P.H., Elliott, K.J., Mohr, H.H., Gray, E.A., Tainter, F.H., Ellis, L.E. 2000. Current research on restoring ridgetop pine communities with stand replacement fire. In: D.A. Yaussey, comp., Proceedings: Workshop on Fire, People, and the Central Hardwoods Landscape. USDA Forest Service General Technical Report NE- 274: 103-109.                                      |
| Wrong Species<br>or Ecosystem | Webb, S.L., Glenn, M.G., Cook, E.R., Wagner, W.S., Thetford, R.D. 1993. Range edge red spruce in New Jersey, U.S.A.: bog versus upland population structure and climate responses. <i>Journal of Biogeography</i> 20: 63-78.                                                                                                                                                                                   |
| Wrong Species<br>or Ecosystem | West, D.C., Doyle, T.W., Tharp, M.L., Beauchamp, J.J., Platt, W.J., Downing, D.J. 1993. Recent growth increases in old-growth longleaf pine. <i>Canadian Journal of Forest Research</i> 23(5): 846-853.                                                                                                                                                                                                        |
| Wrong Species<br>or Ecosystem | Wu, X., McCormick, J.F., Busing, R.T. 1999. Growth pattern of <i>Picea rubens</i> prior to canopy recruitment. <i>Plant Ecology</i> 140(2): 245-253.                                                                                                                                                                                                                                                           |
| Wrong Species<br>or Ecosystem | Ziegler, S. S., E. R. Larson, J. Rauchfuss, and G. P. Elliott. 2008. Tree recruitment during dry spells at an oak savanna in Minnesota. <i>Tree-Ring Research</i> 64:47-54.                                                                                                                                                                                                                                    |

---
