# Supplementary material
Source: publisher figshare collection journal article supplement (https://wiley.figshare.com/articles/dataset/_/3568629)
Supplement: Supplementary file 1 [file 1 › suppl-1.htm]

Ecological Archives M084-023-S1


Neil Pederson, James M. Dyer, Ryan W. McEwan, Amy E. Hessl, Cary J. Mock, David A. Orwig, Harald E. Rieder, Benjamin I. Cook. 2014. The legacy of episodic climatic events in shaping temperate, broadleaf forests. *Ecological Monographs* 84:599–620. http://dx.doi.org/10.1890/13-1025.1

---

Supplement

Spreadsheet with raw recruitment data in different bins, references from which these data are drawn, and reasons for rejecting potential data from additional references.
  
*Ecological Archives* M084-023-S1.

Copyright

---

Authors  
File list (downloads)  
Description

---


Author(s)

Neil Pederson  
Tree Ring Laboratory of Lamont-Doherty Earth Observatory and Columbia University  
Palisades NY 10964\*  
Email: adk@ldeo.columbia.edu, mockernut@gmail.com  
\* current address as of September 1, 2014: Harvard University, Harvard Forest, Petersham, MA, 01366

James M. Dyer  
Department of Geography  
Ohio University  
Athens, OH 45701

Ryan W. McEwan  
Department of Biology  
University of Dayton  
Dayton, OH 45469

Amy E. Hessl  
Department of Geography and Geology  
West Virginia University  
Morgantown, WV 26506

---

File list

File with all studies with potential tree recruitment data - BroadleafForestRawRecruitmentDataAllRecruitRefs.csv (MD5: 54f0fd574b2b01af437054628333eb59)

Rejected studies with potential tree recruitment data with rejection justification - BroadleafForestRawRecruitmentDataRejectedRecruitRefs.pdf (MD5: de048df6fda4f9d5f8df66736b649fef)

Raw tree recruitment data from sources in 10 yr bins - BroadleafForestRawRecruitmentDataRecruitment10yrBins.csv (MD5: 160c1bd36ee13b2a59638b57f5be83d3)

Raw tree recruitment data from sources in 20 yr bins – BroadleafForestRawRecruitmentDataRecruitment20yrBins.csv (MD5: 47b08d2030c8429ed8af9268fc03fa4f)

Raw tree recruitment data from sources in 25 yr bins – BroadleafForestRawRecruitmentDataRecruitment25yrBins.csv (MD5: 8370085c0949841b03a312875be9fd30)

Raw tree recruitment data from sources in 50 yr bins – BroadleafForestRawRecruitmentDataRecruitment50yrBins.csv (MD5: 640c87488a975d3ebf285bec2f6db1c7)

Description

The \*.csv spreadsheets includes the raw data of tree recruitment drawn from previously-published studies or recruitment dates from unpublished studies and data sets across the eastern United States. Forest types that would not expected to have episodic recruitment, i.e., broadleaf-dominated forests, were the focus of this collection of recruitment dates. The data does include recruitment dates from conifers because they were present in mixed forests. As stated in the paper, "*We examined a larger area than that of the 76 chronologies for disturbance detection because a review of independent and geographically-dispersed studies explicitly discussed a recruitment event, broad compositional change, or stand initiation dates in the late-1600s* (Huntington 1914, Haasis 1923, Hough and Forbes 1943, Henry and Swan 1974, Grimm 1983, Guyette et al. 1994, Rentch 2003). Also, we only focused on the period prior to 1850 because of the lareg-scale impacts on forests that occurred after that time.

We first sought out potential papers with trees recruitment data from broadleaf-dominated old-growth forests. We then determined which ones had usable data, which ones were duplicates, and so on (please see the supplemnentary material for more detail). The first \*.csv file, BroadleafForestRawRecruitmentDataAllRecruitRefs.csv, includes all potential papers we thought might have usable data. We then further examined these for usable data. Rejected papers for our analysls are found in Word file 'BroadleafForestRawRecruitmentDataRejectedRecruitRefs.doc'. Also provided in this file is our justification for rejection of these papers.

Raw recruitment dates in the remaining files are grouped according to the bins used in the original studies, <10 yr for the 10 yr binned data and then 20 yr, 25 yr, and 50 yr bins for the remaining data files. The various categories within each bin are related to assessments of uncertainties of each collection. Please see the original manuscript and supplementary material for more detail.

Literature Cited

Grimm, E. 1983. Chronology and dynamics of vegetation change in the prairie-woodland region of southern Minnesota, U.S.A. New Phytologist 93:311–350.

Guyette, R. P., D. C. Dey, and M. C. Stambaugh. 1994. Fire and human history of a barren-forest in southern Indiana. American Midland Naturalist 149:21–34.

Haasis, F. W. 1923. Significance of a 255-year age class in an eastern Kentucky forest. Journal of Forestry 21:700–704.

Henry, J. D., and J. M. A. Swan. 1974. Reconstructing forest history from live and dead plant material - an approach to the study of forest succession in southwest New Hampshire. Ecology 55:772–783.

Hough, A. F., and R. D. Forbes. 1943. The ecology and silvics of forests in the High Plateau of Pennsylvania. Ecological Monographs 13:299–320.

Huntington, E. 1914. The Climatic Factor as Illustrated in Arid America. Page 341. 1st edition. Carnegie Institution of Washington, Washington, D.C.

Rentch, J. 2003. Oak establishment and canopy accession strategies in five old-growth stands in the central hardwood forest region. Forest Ecology and Management 184:285–297.


---

ESA Publications |
Ecological Archives |
Permissions |
Citation |
Contacts
